# Supplementary material for: Levels of Inflammatory Cytokines IL-1β, IL-6, IL-8, IL-17A, and TNF-α in Aqueous Humour of Patients with Diabetic Retinopathy
Source: Hindawi journal article supplement (doi:10.1155/2018/8546423), 2018-01-01
Supplement: f1 [file 8546423.f1.pdf]

## Supplementary Table 1

The correlation analysis results of each two of the assayed cytokines

|                  |              | IL*-6  |         | IL-8   |         | IL-17A |         | TNF*- $\alpha$ |         |
|------------------|--------------|--------|---------|--------|---------|--------|---------|----------------|---------|
|                  |              | r*     | p*      | r      | p       | r      | p       | r              | p       |
| 5-year DR group  | IL-1 $\beta$ | 0.043  | 0.018** | 0.123  | 0.014** | 0.119  | 0.018** | 0.211          | 0.030** |
|                  | IL-6         |        |         | 0.098  | 0.026** | 0.375  | 0.004** | 0.260          | 0.028** |
|                  | IL-8         |        |         |        |         | 0.463  | 0.012** | 0.240          | 0.010** |
|                  | IL-17A       |        |         |        |         |        |         | 0.358          | 0.012** |
| 10-year DR group | IL-1 $\beta$ | 0.538  | 0.015** | 0.166  | 0.009** | 0.393  | 0.005** | 0.190          | 0.024** |
|                  | IL-6         |        |         | 0.026  | 0.002** | 0.228  | 0.001** | 0.081          | 0.000** |
|                  | IL-8         |        |         |        |         | 0.122  | 0.027** | 0.690          | 0.020** |
|                  | IL-17A       |        |         |        |         |        |         | 0.076          | 0.000** |
| 5-year DM group  | IL-1 $\beta$ | -0.042 | 0.859   | -0.177 | 0.456   | 0.034  | 0.886   | -0.802         | 0.737   |
|                  | IL-6         |        |         | 0.261  | 0.267   | -0.054 | 0.820   | 0.008          | 0.972   |
|                  | IL-8         |        |         |        |         | -0.052 | 0.829   | 0.137          | 0.564   |
|                  | IL-17A       |        |         |        |         |        |         | -0.355         | 0.126   |
| 10-year DM group | IL-1 $\beta$ | 0.128  | 0.592   | 0.094  | 0.695   | 0.170  | 0.473   | -0.207         | 0.381   |
|                  | IL-6         |        |         | -0.274 | 0.242   | -0.140 | 0.557   | 0.130          | 0.586   |
|                  | IL-8         |        |         |        |         | 0.057  | 0.810   | -0.065         | 0.786   |
|                  | IL-17A       |        |         |        |         |        |         | -0.294         | 0.289   |

\*IL: Interleukin.

\*TNF: Tumor necrosis factor.

\*r: The coefficients of correlation.

\*p: p<0.05 was considered significant.

\*\*p<0.05
